# Supplementary material
Source: PubMed Central journal article supplement (PMC5266649)
Supplement: NIHMS832591-supplement-SI.pdf [file NIHMS832591-supplement-SI.pdf]

---

| <b>Page</b> | <b>Contents</b>    |
|-------------|--------------------|
| S1          | Table of Contents  |
| S2          | EPR Data           |
| S3          | UV-visible spectra |

---

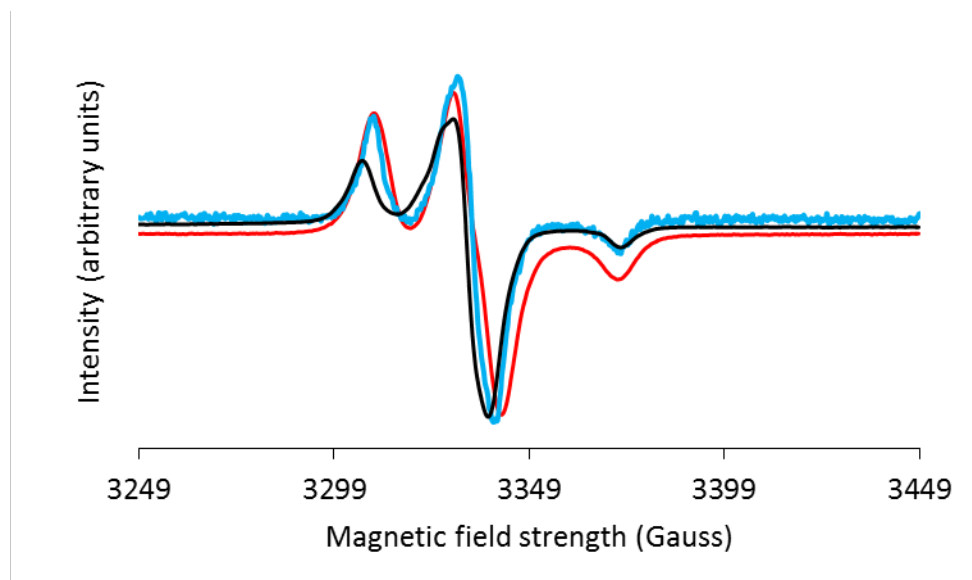

**Figure S1.** EPR spectra of  $\text{EuCl}_2 + \text{O}_2 + \text{BMPO}$  (red),  $\text{EuCl}_3 + \text{KO}_2 + \text{BMPO}$  (blue), and  $\text{KO}_2 + \text{BMPO}$  (black) in methanol at 110 K under Ar.

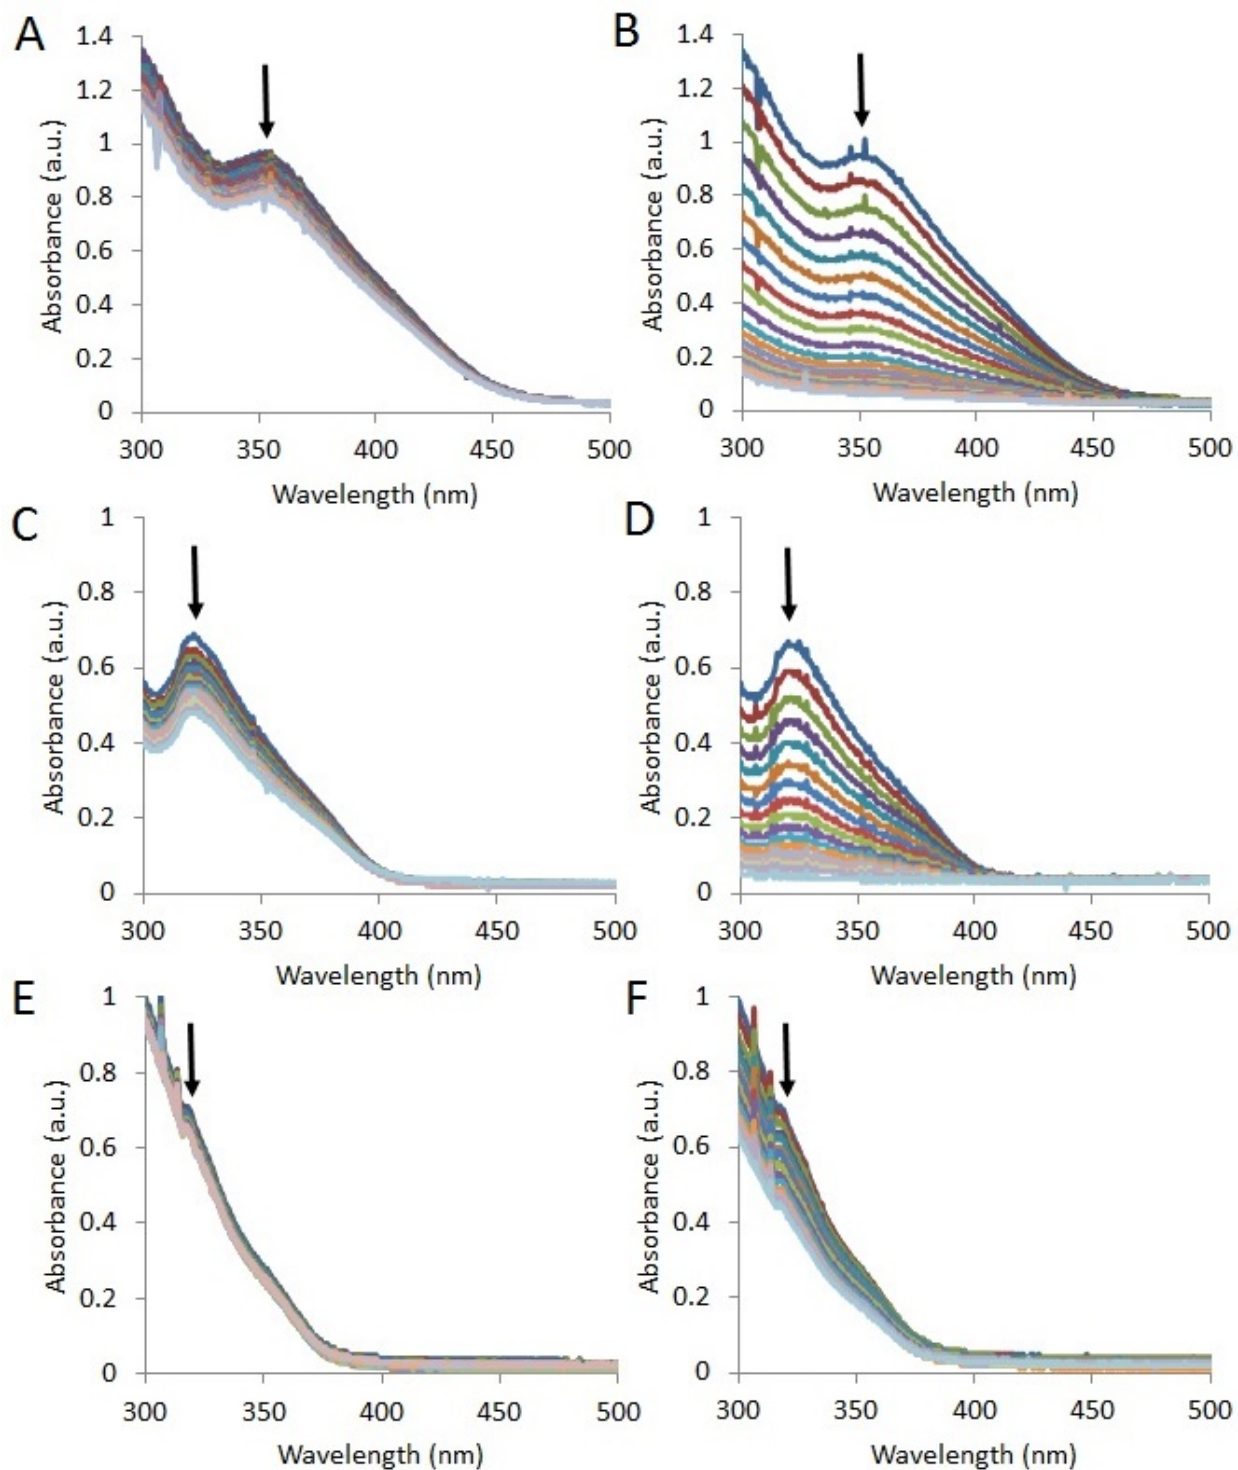

**Figure S2.** Representative UV-visible spectra of bromate oxidizing 1-Eu<sup>II</sup> at (A) pH 7 and (B) 5, EuCl<sub>2</sub>(aq) at (C) pH 7 and (D) 5, and 2-Eu<sup>II</sup> at (E) pH 7 and (F) 5. Spectra were acquired every 15 minutes between 0 and 240 minutes, and the arrows point in the forward direction of time.
